# Supplementary material for: Antitumor and Antibacterial Efficacy of Gallium Nanoparticles Coated by Ellagic Acid
Source: PubMed Central journal article supplement — Dose Response. 2022 Feb 10;20(1):15593258211068998. doi: 10.1177/15593258211068998 (PMC8841935; doi:10.1177/15593258211068998), 2022-02-10
Supplement: sj-pdf-1-dos-10.1177_15593258211068998.pdf [file sj-pdf-1-dos-10.1177_15593258211068998.pdf]

*Supplementary data:*

**Table (1):** Median lethal dose (LD50) of the EA-GaNPs.

| Dose (mg/kg b.w.) | No. of animals | Survivals | Deaths | Mortality % |
|-------------------|----------------|-----------|--------|-------------|
| 1.5               | 10             | 10        | 0      | 0 %         |
| 3.0               | 10             | 9         | 1      | 10 %        |
| 6.5               | 10             | 8         | 2      | 20 %        |
| 12.5              | 10             | 5         | 5      | 50 %        |
| 25.0              | 10             | 3         | 7      | 70 %        |
| 50.0              | 10             | 0         | 10     | 100 %       |

$$\text{proportionate distance} = \frac{50\% - \text{mortality next below } 50\%}{\% \text{ mortality above } 50\% - \text{mortality next below } 50\%}$$

$$= 0.6$$

**Log LD<sub>50</sub>** = Log LD next below 50% + (Log increasing factor x proportionate distance)

$$= \text{Log (6.5)} + (\text{Log } 2 \times 0.6)$$

$$= 9.9 \text{ mg/kg b.w.}$$

**Table (2): illustrated the severity of the histopathological alterations of mammary gland tissues of female rats in different experimental groups:**

| <b>Group no.</b>                                         | <b>I</b> | <b>II</b> | <b>III</b> | <b>IV</b> |
|----------------------------------------------------------|----------|-----------|------------|-----------|
| <b>Histopathological alterations</b>                     |          |           |            |           |
| Hyperplasia of the lining epithelium of t<br>duct system | -        | +++       | -          | -         |
| Cystic ductal dilatation                                 | -        | +++       | -          | -         |
| Stratification of the acinar lining<br>epithelium        | -        | +++       | -          | +         |

Whereas (+++) represented sever alterations, (++) represented moderate alterations, (+) represented mild alterations and (-) represented no alterations.
